# Supplementary material for: Tumor cure by radiation therapy and checkpoint inhibitors depends on pre-existing immunity
Source: PubMed Central journal article supplement (PMC5934473; doi:10.1038/s41598-018-25482-w), 2018-05-03
Supplement: 41598_2018_25482_MOESM1_ESM.pdf [file 41598_2018_25482_MOESM1_ESM.pdf]

# Tumor cure by radiation therapy and checkpoint inhibitors depends on pre-existing immunity

Marka R. Crittenden, Lauren Zebertavage, Gwen Kramer, Shelly Bambina, David Friedman, Victoria Troesch, Tiffany Blair, Jason R. Baird, Alejandro Alice, Michael J. Gough

## Supplemental Figure 1

a) i) Experimental design

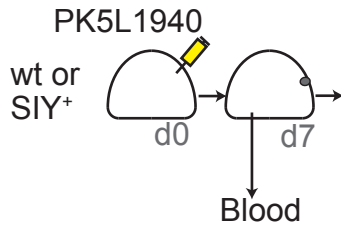

ii) d7 blood

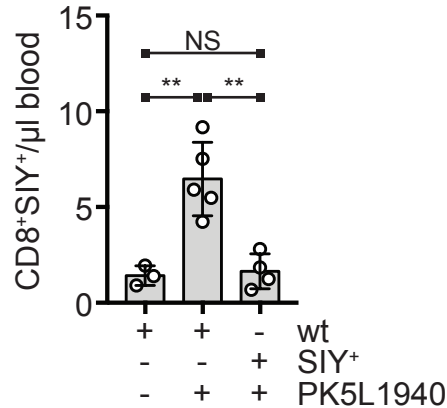

iii) Tumor growth

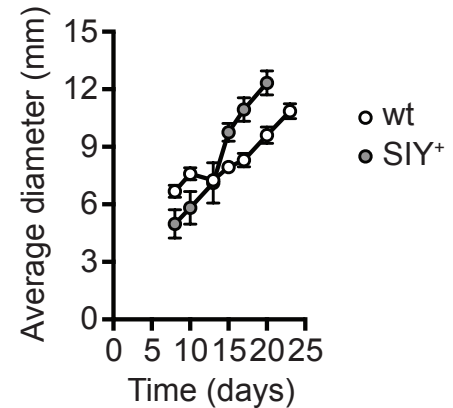

b) i) Experimental design

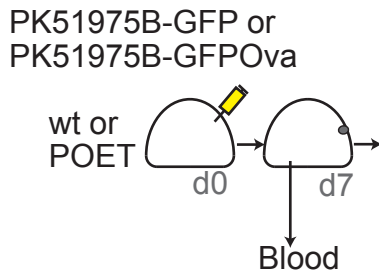

ii) d7 blood

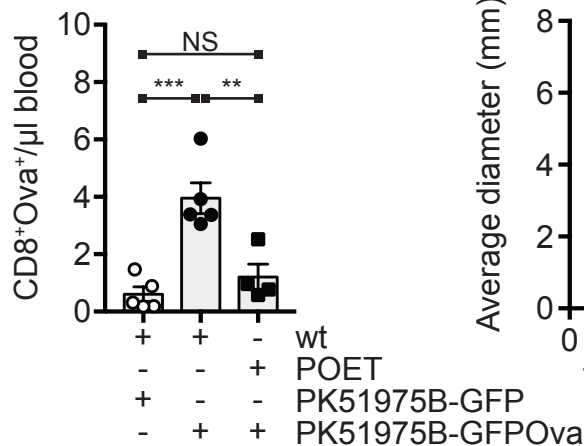

iii) Tumor growth

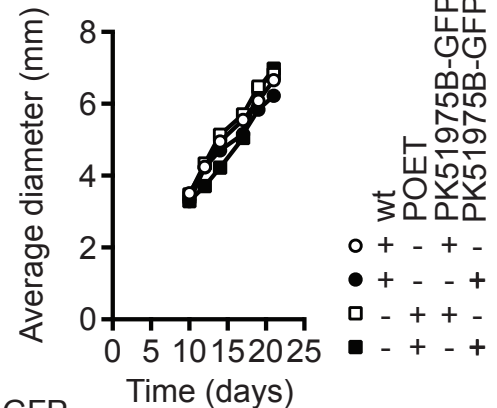

### T cell response to tumor implantation in spontaneous pancreatic tumor models.

a) i) Wild type C57BL/6 mice or POET mice expressing ovalbumin in the prostate were implanted with  $2 \times 10^5$  cells of a cell line derived from spontaneous pancreatic cancer in Pdx-Cre<sup>+/-</sup> Kras(G12D)<sup>+/-</sup> Trp53(R172H)<sup>+/-</sup> mice, engineered to express GFP (PK51975B-GFP) or a GFP-SIINFEKL fusion protein (PK51975B-GFPOva). ii) 7 days later peripheral blood was analyzed for the presence of CD8 T cells specific for Ova using SIINFEKL-tetramers. iii) Growth of PK51975B-GFP or PK51975B-GFPOva in Wild type C57BL/6 mice or POET mice. b) i) Wild type C57BL/6 mice or PDX-Cre<sup>+</sup>SIY<sup>+</sup> mice expressing SIY in the pancreas were implanted with  $2 \times 10^5$  cells from a cell line derived from spontaneous pancreatic cancer in Pdx-Cre<sup>+/-</sup> Kras(G12D)<sup>+/-</sup> Trp53(R172H)<sup>+/-</sup>SIY<sup>+</sup> mice that endogenously expresses the SIY antigen (PK5L1940). ii) 7 days later peripheral blood was analyzed for the presence of CD8 T cells specific for SIY using SIY-pentamers. iii) Growth of PK5L1940 tumors in wild type C57BL/6 mice or PDX-Cre<sup>+</sup>SIY<sup>+</sup> mice. Each symbol represents one animal. Key: NS = not significant, \*= $p < 0.05$ ; \*\*= $p < 0.01$ ; \*\*\*= $p < 0.001$ .

## Tumor cure by radiation therapy and checkpoint inhibitors depends on pre-existing immunity

Marka R. Crittenden, Lauren Zebertavage, Gwen Kramer, Shelly Bambina, David Friedman, Victoria Troesch, Tiffany Blair, Jason R. Baird, Alejandro Alice, Michael J. Gough

### Supplementary Figure 2

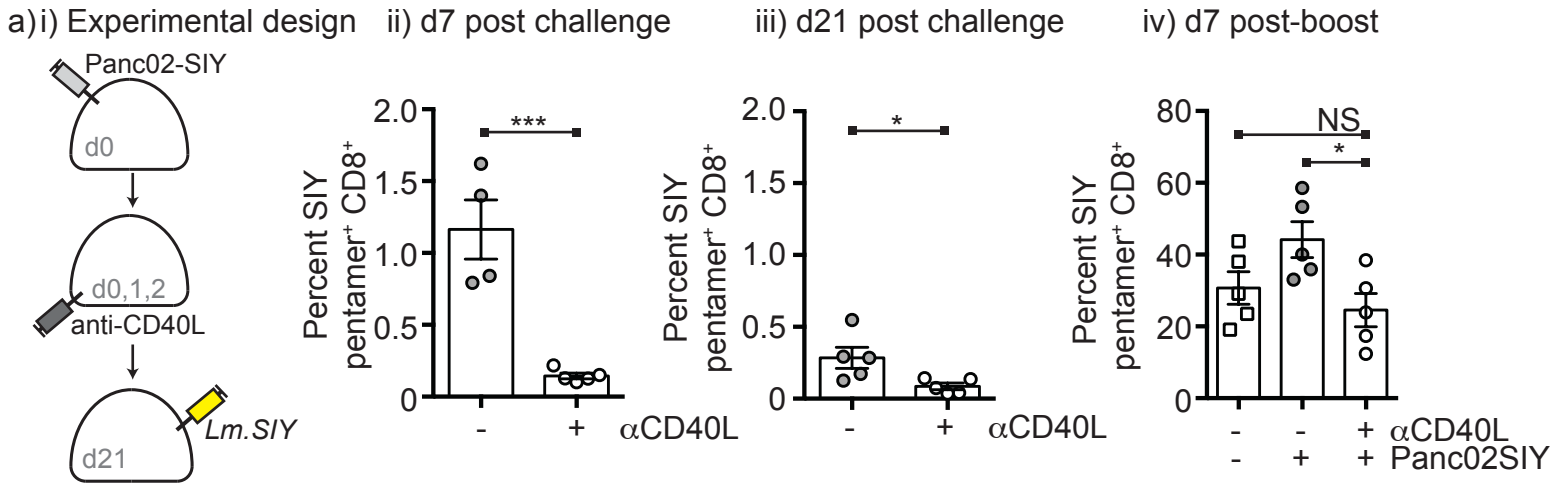

### Anti-CD40L blocks the antigens-specific response to tumor implantation but does not eliminate antigen-specific cells.

a) i) C57BL/6 mice were implanted with Panc02-SIY tumors on d0 and left untreated or treated with 250 $\mu$ g anti-CD40L on d0, d1 and d2. Peripheral blood was analyzed for the presence of CD8 T cells specific for SIY using SIY-pentamers ii) 7 days or iii) 21 days following tumor challenge. iv) After analysis of blood on d21, tumor-bearing mice or a group of naïve mice were vaccinated by IV injection of *Listeria monocytogenes* expressing SIY (Lm.SIY) and analyzed for CD8 T cells specific for SIY in the spleen 7 days later. Each symbol represents one animal. Key: NS = not significant, \* = p < 0.05; \*\* = p < 0.01; \*\*\* = p < 0.001.
